# Supplementary material for: New 1,3,4-Oxadiazole Based Photosensitizers for Dye Sensitized Solar Cells (DSSCs)
Source: Hindawi journal article supplement (doi:10.1155/2015/637652), 2015-01-01
Supplement: f1 [file 637652.f1.docx]

D1


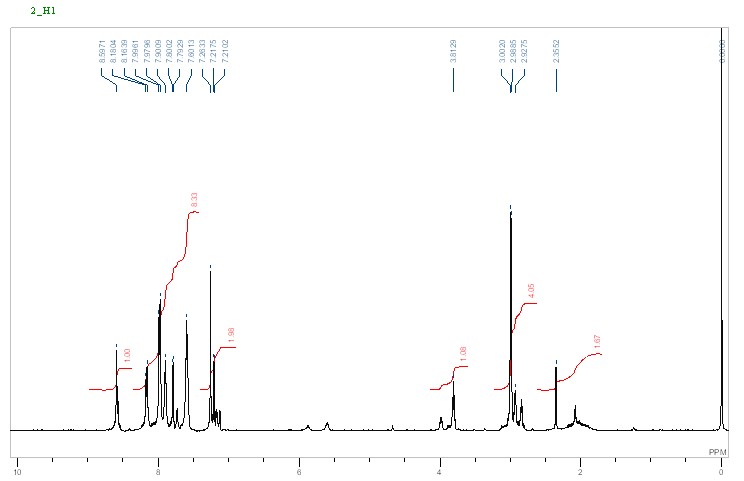


**(*E*)-2-Cyano-3-(5-(5-(naphthalen-2-yl)-1,3,4-oxadiazol-2-yl)thiophen-2-yl)acrylic acid [D1]**

1H NMR (DMSO): δ 7.40.7.55 (m, 3H), 7.80 (d, *J* = 7.8 Hz, 1H), 7.90 (d, *J* = 5.5 Hz, 1H), 7.95-8.15 (m, 3H), 8.20 (d, *J* = 5.5Hz, 1H), 8.60 (s, IH); IR (KBr): υ 3417.9, 3060, 2247.2, 1675.8, 1587.9 cm-1. ESI-MS: *m/z*: 373 [M+].

D2


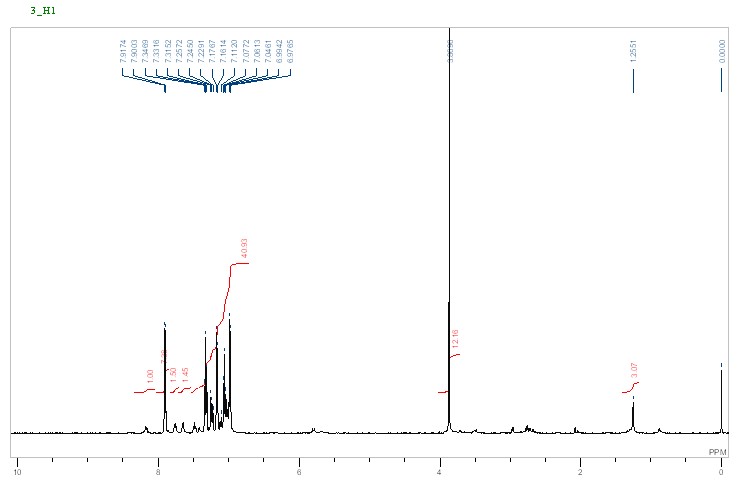


**(*E*)-3-(5-(5-([1,1'-Biphenyl]-4-yl)-1,3,4-oxadiazol-2-yl)thiophen-2-yl)-2-cyanoacrylic acid [D2]**

1H NMR (DMSO): δ 7.40 (dd, *J* = 8.0, 2.1 Hz, 2H), 7.45 (t, *J* = 8.0 Hz, 2H), 7.65 (d, *J* = 8.0 Hz, 2H), 7.80 (d, *J* = 8.1 Hz, 2H), 7.83 (*J* = 5.6 Hz, 1H), 7.90 (*J* = 5.6 Hz, 1H), 8.20 (d, *J* = 8.1 Hz, 2H). 8.25 (s, 1H). IR (KBr): υ 3420, 3058, 2248, 1670, 1590 cm-1; ESI-MS: *m/z*: 399 [M+].

D3


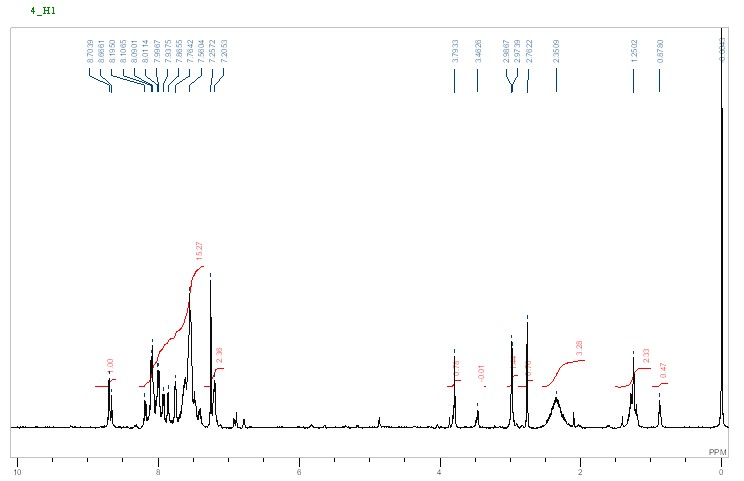


***E*)-3-(5-(5-(Anthracen-9-yl)-1**,**3**,**4-oxadiazol-2-yl)thiophen-2-yl)-2-cyanoacrylic acid [D3]**

IR (KBr): υ 3415.6, 3060, 2249.2, 1675.8, 1587.9 cm-1. ESI-MS: *m/z*: 423 [M+].

D4


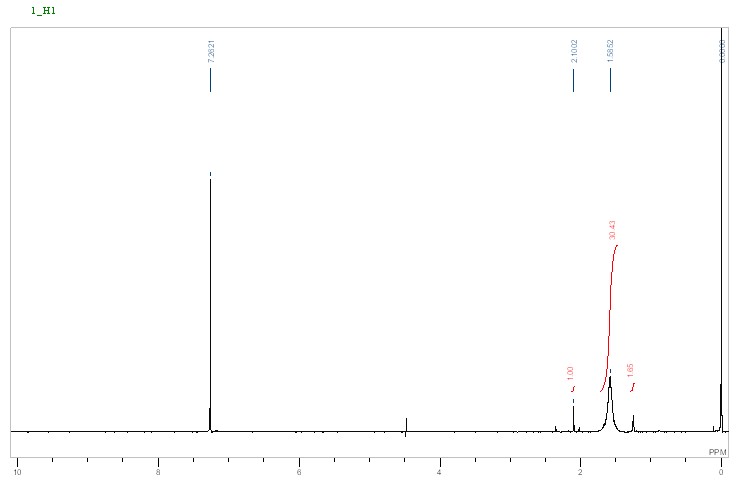


**(*E*)-2-Cyano-3-(5-(5-(4-(diphenylamino)phenyl)-1,3,4-oxadiazol-2-yl)thiophen-2-yl)acrylic acid [D4]**

1H NMR(DMSO):δ6.9-7.60 (m, 14H),7.80 (s, 1H), 8.0 (d, *J* = 8.0 Hz, 2H), 8.20 (d, *J* = 8.0 Hz, 2H). IR (KBr): υ 3347.1, 3060, 2248.2, 1675.8, 1587.9 cm-1; ESI-MS: *m/z*: 490 [M+].

**(**
